# Supplementary material for: Total Nitrogen Stock in Soil Profile Affected by Land Use and Soil Type in Three Counties of Mollisols
Source: Frontiers journal article supplement (doi:10.3389/fenvs.2022.945305), 2022-06-30
Supplement: Data_Sheet_1.docx [file Data_Sheet_1.docx]

**Total Nitrogen Stock in Soil Profile Affected by Land Use and Soil Type in Black Soil**

***Meng Li 1, Xiaozeng Han 1, Lu-Jun Li 1,2****

*1Hailun National Observation and Research Station of Agroecosystems, Northeast Institute of Geography and Agroecology, Chinese Academy of Sciences, Harbin 150081, China, 2 College of Advanced Agricultural Sciences, University of Chinese Academy of Sciences, Beijing 100049, China*

****Correspondence: Lu-Jun Li***

*Northeast Institute of Geography and Agroecology*

*Chinese Academy of Sciences*

*E-mail: [lilujun@iga.ac.cn](mailto:lilujun@iga.ac.cn)*

**SUPPLEMENTARY MATERIAL**

**TABLE S1 |** STND response to land use type, soil type and soil depth

| **Three-way ANOVA** | ***p* value** |
| --- | --- |
| Land use | 0.580 |
| Soil type | 0.000 |
| Soil depth | 0.000 |
| Land use*soil type | 0.261 |
| Soil type*depth | 0.839 |
| Land use*depth | 0.555 |
| Land use*soil type*soil depth | 0.471 |

**TABLE S2 |** Results of multiple stepwise regression analysis for significant STND relationships with various attributes of the sampling sites in 0–100 cm depth.

| **Depend Variable** | **Variable** | **Standardized Regression Coefficient** | **S.E.** | ***R2*** |
| --- | --- | --- | --- | --- |
| Rice paddy | SOC | 0.807 | 19.62 | 0.651 |
| Dry land | SOC | 0.722 | 20.23 | 0.522 |
| Haplic Phaeozem | SOC | 0.649 | 23.92 | 0.421 |
| Haplic Chernozem | SOC | 0.566 | 14.3 | 0.321 |
| Luvic Phaeozem | SOC | 0.823 | 21.17 | 0.667 |
| All samples | SOC | 0.748 | 20.05 | 0.56 |
